# Supplementary material for: Virtual Interviews for the Integrated Plastic Surgery Residency Match: The Program Director Perspective
Source: PubMed Central journal article supplement — Plast Reconstr Surg Glob Open. 2021 Jul 27;9(7):e3707. doi: 10.1097/GOX.0000000000003707 (PMC8376389; doi:10.1097/gox.0000000000003707), 2021-07-27
Supplement: gox-9-e3707-s001.pdf [file gox-9-e3707-s001.pdf]

1. What region of the country is your program?

- Midwest
- Northeast
- South
- West

2. How many available residency spots did you have for the 2020-21 application cycle?

1 5

3. How many total applicants did you interview?

1 150

4. Did you increase the number of interview offers **per available residency spot**?

- Yes
- No

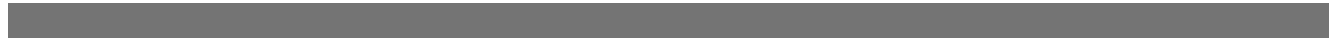

\* 5. How many additional interview spots did you increase by?

1 30

6. Did you host a pre- or post-interview social?

Yes

No

7. What do you think is the ideal length of time for a pre- or post-interview social?

30-59 minutes

1-2 hours

2+ hours

Other (please specify)

8. Which faculty or staff members do you think should attend a pre- or post-interview social? Please select all that apply

Residents

Program Director

Chief or Chair

Other Attending Staff Members

Midlevel Providers

Other (please specify)

9. How useful did you find the pre- or post-interview social to be?

Extremely useful

Very useful

Somewhat useful

Not so useful

Not at all useful

Not Applicable

## Interview Specifics

Please answer questions as they relate to virtual interviews during the 2020-21 application cycle.

10. Overall, how well were you able to judge an applicant's professionalism?

- Extremely well
- Very well
- Moderately well
- Slightly well
- Not well at all
- Not applicable

11. Overall, how well were you able to judge an applicant's interpersonal and communication skills?

- Extremely well
- Very well
- Moderately well
- Slightly well
- Not well at all
- Not applicable

12. Overall, how well were you able to judge an applicant's "fit" with your program?

- Extremely well
- Very well
- Moderately well
- Slightly well
- Not well at all
- Not applicable

13. Overall, how satisfied were you with the virtual interview process?

- Extremely satisfied
- Somewhat satisfied
- Neither satisfied nor dissatisfied
- Somewhat dissatisfied
- Extremely dissatisfied

14. Which interview process do you prefer?

- Virtual Interviews
- In-Person Interviews
- No Preference

15. Is there anything else you wish to share about the virtual interview process?
